# Supplementary material for: Modeling the subsurface adsorption of atomic oxygen in silver from high vacuum to high pressure
Source: Royal Society of Chemistry journal article supplement (doi:10.1039/d5cp00009b), 2025-01-01
Supplement: d5cp00009b2.xlsx [file d5cp00009b2.xlsx]

## Sheet: Lattice-gas-model-parameters-O-
Distances are expressed in units of the lattice constant.
Energies are expressed in eV.
Interaction distances that fall outside our cutoff range of sqrt(2)*a are set to zero in the file. The corresponding interaction energies are also set to zero.
Abbreviations used in the files:
a = Lattice constant (Angstrom)
Site
A = Above Atom, Surface
H = HCP Hollow, Surface
F = FCC Hollow, Surface
B = Between Site, Surface
T1 = Tetrahedral, 1st subsurface
O1 = Octahedral, 1st subsurface
I1 = Inverted Tetrahedral, 1st subsurface
T2 = Tetrahedral, 2nd subsurface
O2 = Octahedral, 2nd subsurface
I2 = Inverted Tetrahedral, 2nd subsurface
T3 = Tetrahedral, near bulk
O3 = Octahedral, near bulk
I3 = Inverted Tetrahedral, near bulk
T = Tetrahedral/Inverted Tetrahedral, bulk
O = Octahedral, bulk
a (Ang)	4.213
Site	Ei (eV)
A	-2.13145
H	-3.43302
F	-3.52302
B	-3.23472
T1	-2.54569
O1	-3.0342
I1	-3.14886
T2	-2.48232
O2	-2.71069
I2	-2.42425
T3	-2.47413
O3	-2.73807
I3	-2.4451
T	-2.46595
O	-2.76546
Pair	1N d(a)	1N delEij(eV)	2N dist(a)	2N delEij(eV)	3N dist(a)	3N delEij(eV)	4N dist(a)	4N delEij(eV)	5N dist(a)	5N delEij(eV)	6N dist(a)	6N delEij(eV)
A/A	0.707	0.271	1.225	0.032	1.414	0.05
H/A	0.408	0.244	0.816	0.177	1.08	0.06
H/H	0.707	0.493	1.225	0.043	1.414	-0.01
F/A	0.408	0.302	0.816	0.219	1.08	0.057
F/H	0.408	1.476	0.816	-0.048	1.08	0.033
F/F	0.707	0.532	1.225	0.035	1.414	-0.014
B/A	0.354	0.154	0.612	0.54	0.935	0.104	1.061	0.05	1.275	0.025
B/H	0.204	13.41	0.54	1.07	0.736	0.494	0.89	0.073	1.021	0.126	1.137	0.038
B/F	0.204	17.65	0.54	1.204	0.736	0.447	0.89	0.084	1.021	0.044	1.137	0.039
B/B	0.354	0.425	0.612	0.649	0.707	0.637	1.061	0.042	1.225	0.01	1.414	-0.003
T1/A	0.577	-0.273	0.913	-0.163	1.354	0.01
T1/H	0.707	-0.188	1	-0.073	1.225	0.106
T1/F	0.707	-0.14	1	-0.016	1.225	0.469
T1/B	0.677	0.48	0.842	0.309	1.099	0.042	1.208	0.04	1.399	0.048
T1/T1	0.707	-0.06	1.225	-0.005	1.414	0.026
O1/A	0.707	0.326	1	-0.05	1.225	-0.022
O1/H	0.707	0.23	1	-0.18	1.225	0.002
O1/F	0.577	0.573	0.913	0.085	1.354	0.091
O1/B	0.612	0.502	0.791	0.195	0.935	0.085	1.061	-0.141	1.173	-0.141	1.275	0.046
O1/T1	0.408	0.861	0.816	-0.182	1.08	-0.089
O1/O1	0.707	-0.076	1.225	0.092	1.414	0.046
I1/A	0.707	0.477	1	0.527	1.225	0.354
I1/H	0.577	1.531	0.913	0.335	1.354	0.186
I1/F	0.707	0.618	1	0.287	1.225	0.248
I1/B	0.612	1.294	0.791	0.763	0.935	0.336	1.061	0.381	1.173	0.34	1.275	0.258
I1/T1	0.408	1.511	0.816	0.296	1.08	0.862
I1/O1	0.408	2.115	0.816	0.794	1.08	0.312
I1/I1	0.707	0.576	1.225	0.41	1.414	0.539
T2/A	1.225	0.082	1.414	-0.084	0	0
T2/H	1.155	-0.034	1.354	-0.032	0	0
T2/F	1.225	-0.056	1.414	-0.124	0	0
T2/B	1.173	-0.011	1.275	-0.036	1.369	-0.046
T2/T1	0.707	-0.169	1	-0.18	1.225	-0.028
T2/O1	0.707	-0.064	1	-0.013	1.225	0.017
T2/I1	0.577	0.169	0.913	0.182	1.354	0.161
T2/T2	0.707	-0.216	1.225	0.016	1.414	0.02
O2/A	1.155	0.09	1.354	-0.053	0	0
O2/H	1.225	0.01	1.414	-0.033	0	0
O2/F	1.225	0.001	1.414	-0.003	0	0
O2/B	1.208	-0.085	1.307	-0.039	0	0
O2/T1	0.577	0.149	0.913	-0.003	1.354	0.025
O2/O1	0.707	-0.066	1	0.026	1.225	-0.008
O2/I1	0.707	0.284	1	0.242	1.225	0.321
O2/T2	0.408	1.493	0.816	-0.082	1.08	-0.098
O2/O2	0.707	-0.181	1.225	-0.034	1.414	0.012
I2/A	1.225	0.069	1.414	-0.012	0	0
I2/H	1.225	-0.112	1.414	0.055	0	0
I2/F	1.155	-0.109	1.354	0.011	0	0
I2/B	1.173	-0.034	1.275	-0.107	1.369	-0.06
I2/T1	0.707	0.161	1	0.062	1.225	-0.053
I2/O1	0.577	0.37	0.913	-0.029	1.354	-0.013
I2/I1	0.707	0.284	1	0.398	1.225	0.398
I2/T2	0.408	0.835	0.816	-0.371	1.08	-0.148
I2/O2	0.408	1.844	0.816	-0.256	1.08	-0.103
I2/I2	0.707	-0.182	1.225	-0.013	1.414	0.03
T3/A	0	0	0	0	0	0
T3/H	0	0	0	0	0	0
T3/F	0	0	0	0	0	0
T3/B	0	0	0	0	0	0
T3/T1	1.225	0.027	1.414	-0.023	0	0
T3/O1	1.155	0.007	1.354	-0.002	0	0
T3/I1	1.225	0.096	1.414	-0.003	0	0
T3/T2	0.707	-0.113	1	-0.161	1.225	0.041
T3/O2	0.707	-0.07	1	-0.049	1.225	-0.022
T3/I2	0.577	0.14	0.913	0.085	1.354	0.109
T3/T3	0.707	-0.137	1.225	0.063	1.414	0.049
O3/A	0	0	0	0	0	0
O3/H	0	0	0	0	0	0
O3/F	0	0	0	0	0	0
O3/B	0	0	0	0	0	0
O3/T1	1.225	-0.03	1.414	0.012	0	0
O3/O1	1.225	0.017	1.414	0.004	0	0
O3/I1	1.155	0.069	1.354	-0.013	0	0
O3/T2	0.577	0.245	0.913	-0.019	1.354	0.026
O3/O2	0.707	-0.104	1	0.059	1.225	0.007
O3/I2	0.707	0.104	1	0.079	1.225	0.13
O3/T3	0.408	0.886	0.816	-0.093	1.08	-0.079
O3/O3	0.707	-0.161	1.225	-0.006	1.414	0.026
I3/A	0	0	0	0	0	0
I3/H	0	0	0	0	0	0
I3/F	0	0	0	0	0	0
I3/B	0	0	0	0	0	0
I3/T1	1.155	-0.177	1.354	0.035	0	0
I3/O1	1.225	-0.086	1.414	0.041	0	0
I3/I1	1.225	0.089	1.414	0.033	0	0
I3/T2	0.707	0.052	1	-0.04	1.225	0.029
I3/O2	0.577	0.355	0.913	-0.032	1.354	0.007
I3/I2	0.707	0.114	1	0.128	1.225	0.254
I3/T3	0.408	0.213	0.816	-0.363	1.08	-0.199
I3/O3	0.408	1.062	0.816	-0.179	1.08	-0.082
I3/I3	0.707	-0.119	1.225	0.048	1.414	0.054
T/A	0	0	0	0	0	0
T/H	0	0	0	0	0	0
T/F	0	0	0	0	0	0
T/B	0	0	0	0	0	0
T/T1	0	0	0	0	0	0
T/O1	0	0	0	0	0	0
T/I1	0	0	0	0	0	0
T/T2	1.155	-0.246	1.225	0.11	1.354	0.058	1.414	0.078
T/O2	1.155	0.048	1.225	-0.061	1.354	0.027	1.414	0.028
T/I2	1.225	0.11	1.414	0.078	0	0
T/T3	0.707	-0.057	1	-0.143	1.225	0.11
T/O3	0.707	-0.076	1	-0.085	1.155	0.048	1.225	-0.061	1.354	0.027
T/I3	0.577	0.11	0.913	-0.012	1.225	0.11	1.354	0.058	1.414	0.078
T/T	0.408	-0.408	0.707	-0.057	0.913	-0.012	1.08	-0.249	1.225	0.11	1.414	0.078
T/T	0.577	0.11	0.816	-0.354	1	-0.143	1.155	-0.246	1.354	0.058
O/A	0	0	0	0	0	0
O/H	0	0	0	0	0	0
O/F	0	0	0	0	0	0
O/B	0	0	0	0	0	0
O/T1	0	0	0	0	0	0
O/O1	0	0	0	0	0	0
O/I1	0	0	0	0	0	0
O/T2	1.225	-0.061	1.414	0.028	0	0
O/O2	1.225	0.023	1.414	0.04	0	0
O/I2	1.155	0.048	1.354	0.027	0	0
O/T3	0.577	0.34	0.913	-0.035	1.225	-0.061	1.354	0.027	1.414	0.028
O/O3	0.707	-0.142	1	0.092	1.225	0.023	1.414	0.04
O/I3	0.707	-0.076	1	-0.085	1.155	0.048	1.225	-0.061	1.354	0.027
O/T	0.408	0.28	0.707	-0.076	0.913	-0.035	1.08	-0.061	1.225	-0.061	1.414	0.028
O/T	0.577	0.34	0.816	-0.103	1	-0.085	1.155	0.048	1.354	0.027
O/O	0.707	-0.142	1	0.092	1.225	0.023	1.414	0.04
